# Supplementary figures and images for: Nuclear size changes caused by local motion of cell boundaries unfold the nuclear lamina and dilate chromatin and intranuclear bodies
Source: Royal Society of Chemistry journal article supplement (doi:10.1039/c9sm01666j), 2019-01-01

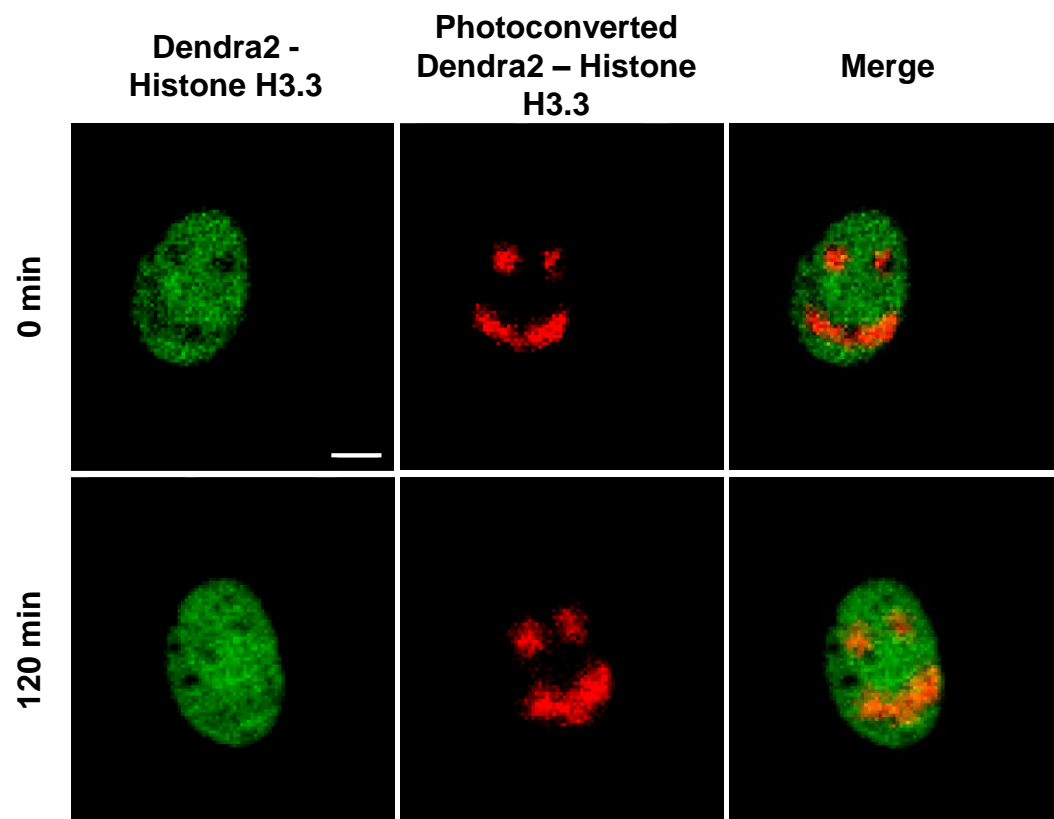

Figure S2

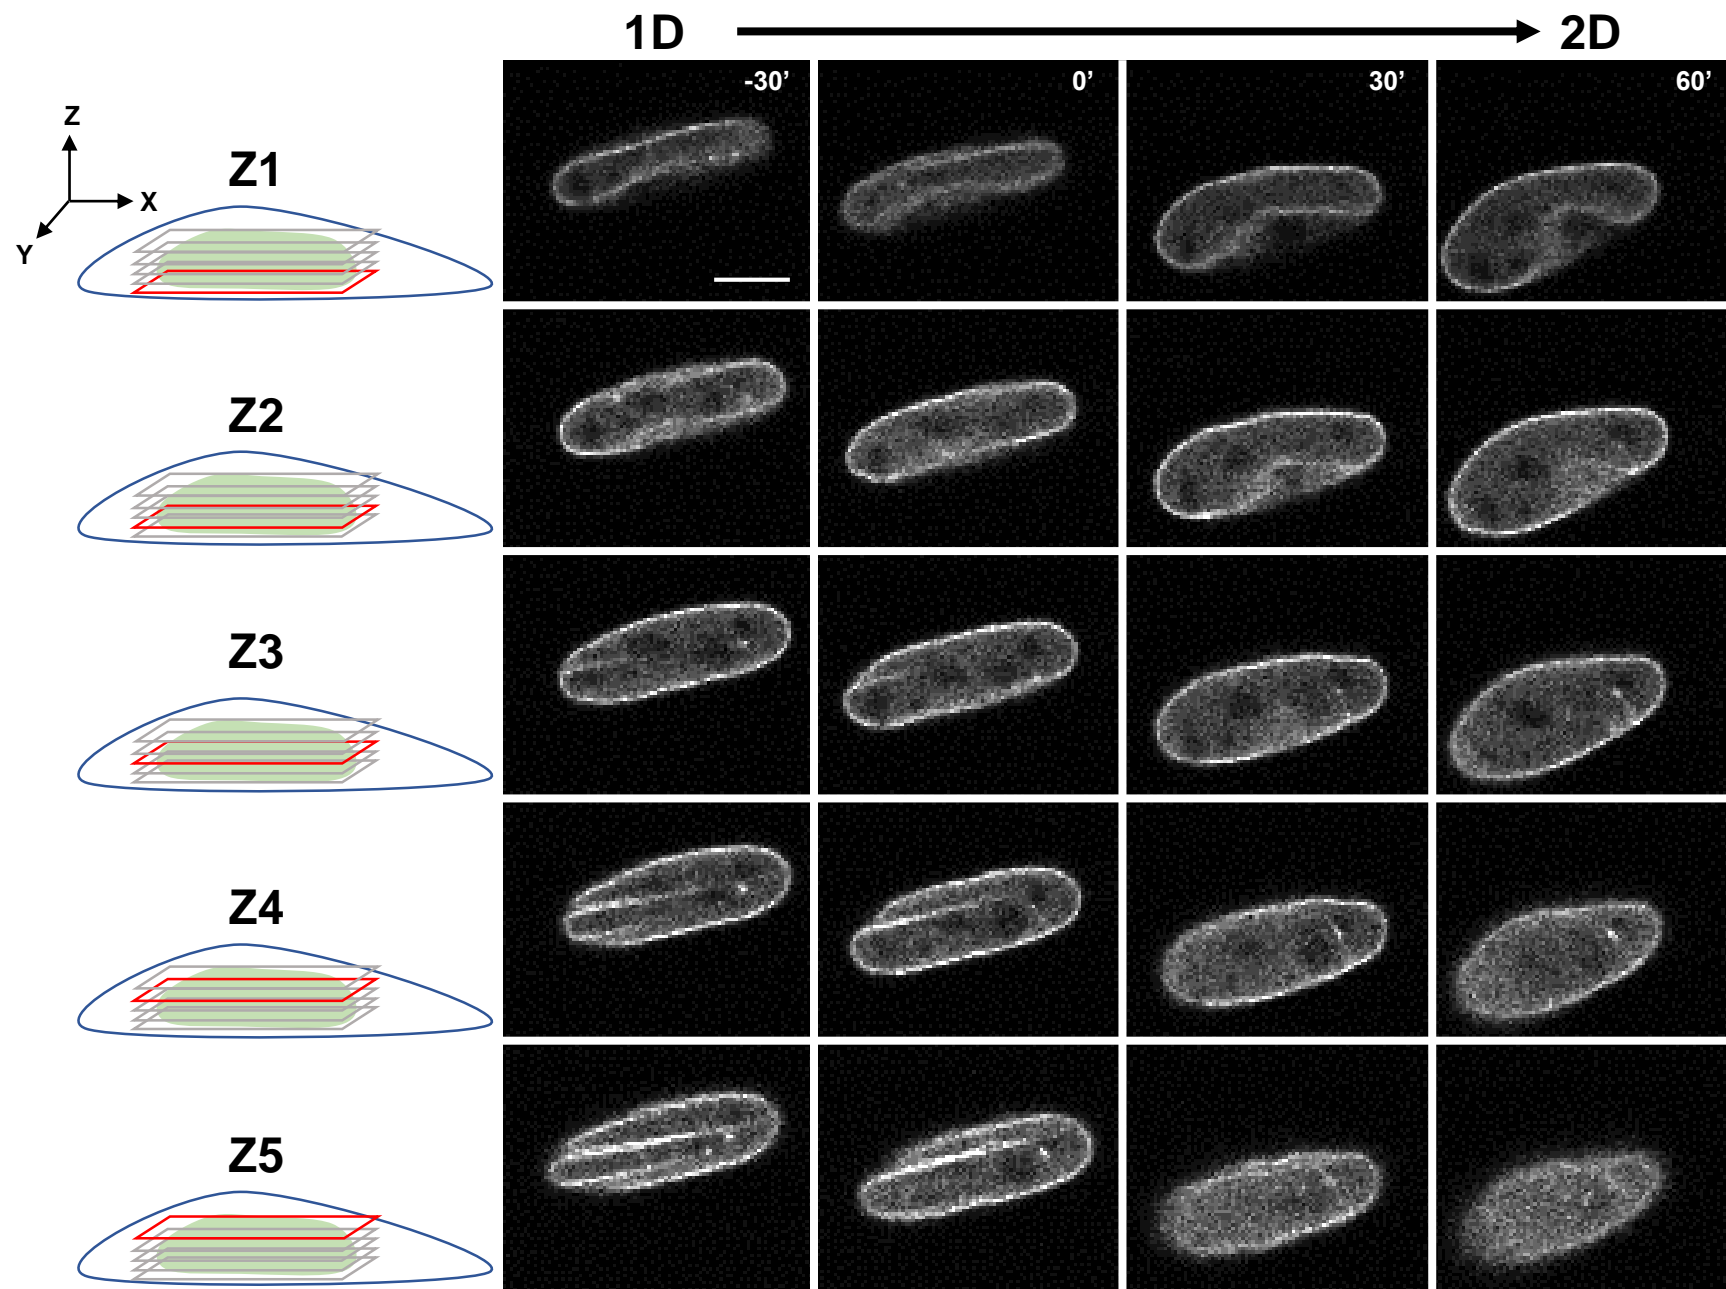

Figure S3

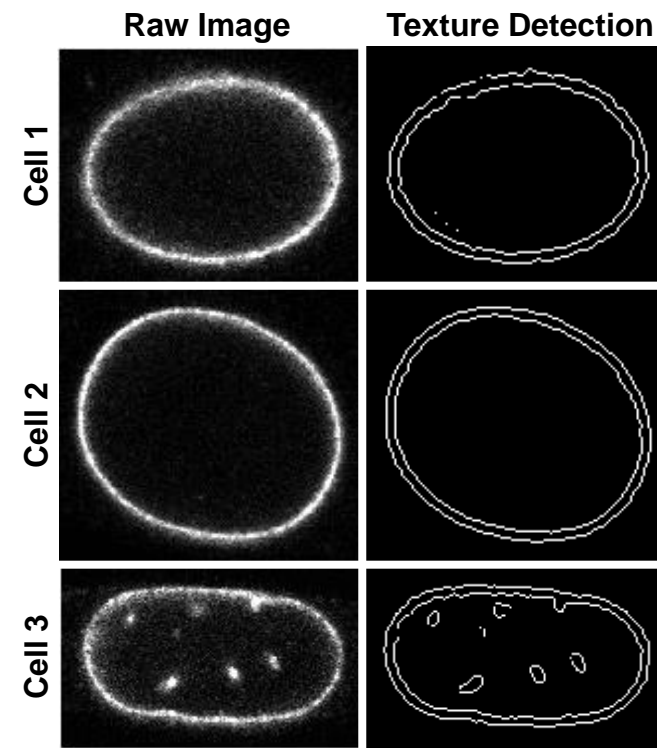

Supplement: c9sm01666j9.pdf [file c9sm01666j9.pdf]
